# Supplementary material
Source: publisher figshare collection journal article supplement (https://diabetesjournals.figshare.com/ndownloader/files/26113586)
Supplement: Supplementary file 1 [file 26113586]

## Sheet: all_XWAS
FieldID	Field	Response	Reference	Class	HR	P-val	Q-val	N	Original Data Class	QC Data Class
120	Birth weight known	Yes - Kilograms	Yes - pounds and ounces	Unordered Categorical	1.37	0.59	0.82	119137	numeric	factor
120	Birth weight known	No	Yes - pounds and ounces	Unordered Categorical	1.06	0.13	0.24	119137	numeric	factor
670	Type of accommodation lived in	None of the above	A house or bungalow	Unordered Categorical	0.84	0.73	0.91	119101	ordered	factor
670	Type of accommodation lived in	A flat maisonette or apartment	A house or bungalow	Unordered Categorical	1.59	0	0	119101	ordered	factor
670	Type of accommodation lived in	Mobile or temporary structure (i.e. caravan)	A house or bungalow	Unordered Categorical	1.87	0.1	0.2	119101	ordered	factor
670	Type of accommodation lived in	Sheltered accommodation	A house or bungalow	Unordered Categorical	1.96	0.02	0.05	119101	ordered	factor
670	Type of accommodation lived in	Care home	A house or bungalow	Unordered Categorical	0	0.97	1	119101	ordered	factor
680	Own or rent accommodation lived in	None of the above	Own outright (by you or someone in your household)	Unordered Categorical	1.17	0.65	0.86	118304	ordered	factor
680	Own or rent accommodation lived in	Own with a mortgage	Own outright (by you or someone in your household)	Unordered Categorical	1.27	0	0	118304	ordered	factor
680	Own or rent accommodation lived in	Rent - from local authority local council housing association	Own outright (by you or someone in your household)	Unordered Categorical	3.11	0	0	118304	ordered	factor
680	Own or rent accommodation lived in	Rent - from private landlord or letting agency	Own outright (by you or someone in your household)	Unordered Categorical	1.81	0	0	118304	ordered	factor
680	Own or rent accommodation lived in	Pay part rent and part mortgage (shared ownership)	Own outright (by you or someone in your household)	Unordered Categorical	2.39	0.01	0.02	118304	ordered	factor
680	Own or rent accommodation lived in	Live in accommodation rent free	Own outright (by you or someone in your household)	Unordered Categorical	0.85	0.6	0.83	118304	ordered	factor
699	Length of time at current address			Continuous	0.97	0.1	0.13	116545	numeric	numeric
709	Number in household			Continuous	0.82	0	0	118539	numeric	numeric
728	Number of vehicles in household	One	None	Ordered Categorical	0.55	0	0	118487	ordered	ordered
728	Number of vehicles in household	Two	None	Ordered Categorical	1.27	0.01	0.02	118487	ordered	ordered
728	Number of vehicles in household	Three	None	Ordered Categorical	0.93	0.35	0.56	118487	ordered	ordered
728	Number of vehicles in household	Four or more	None	Ordered Categorical	0.93	0.18	0.32	118487	ordered	ordered
738	Average total household income before tax	18,000 to 30,999	Less than 18,000	Ordered Categorical	0.38	0	0	102714	ordered	ordered
738	Average total household income before tax	31,000 to 51,999	Less than 18,000	Ordered Categorical	0.92	0.41	0.63	102714	ordered	ordered
738	Average total household income before tax	52,000 to 100,000	Less than 18,000	Ordered Categorical	0.87	0.05	0.11	102714	ordered	ordered
738	Average total household income before tax	Greater than 100,000	Less than 18,000	Ordered Categorical	0.99	0.88	1	102714	ordered	ordered
864	Number of days/week walked 10+ minutes			Continuous	0.96	0	0	117264	numeric	numeric
874	Duration of walks			Continuous	0.95	0.02	0.02	102122	numeric	numeric
884	Number of days/week of moderate physical activity 10+ minutes			Continuous	0.95	0	0	113582	numeric	numeric
904	Number of days/week of vigorous physical activity 10+ minutes			Continuous	0.91	0	0	113603	numeric	numeric
924	Usual walking pace	Slow pace	None of the above	Ordered Categorical	0.3	0	0	118759	ordered	ordered
924	Usual walking pace	Steady average pace	None of the above	Ordered Categorical	0.68	0.02	0.05	118759	ordered	ordered
924	Usual walking pace	Brisk pace	None of the above	Ordered Categorical	1.4	0	0	118759	ordered	ordered
943	Frequency of stair climbing in last 4 weeks	1-5 times a day	None	Ordered Categorical	0.59	0	0	118247	ordered	ordered
943	Frequency of stair climbing in last 4 weeks	6-10 times a day	None	Ordered Categorical	1.22	0	0.01	118247	ordered	ordered
943	Frequency of stair climbing in last 4 weeks	11-15 times a day	None	Ordered Categorical	1.21	0	0.01	118247	ordered	ordered
943	Frequency of stair climbing in last 4 weeks	16-20 times a day	None	Ordered Categorical	0.94	0.27	0.45	118247	ordered	ordered
943	Frequency of stair climbing in last 4 weeks	More than 20 times a day	None	Ordered Categorical	0.98	0.62	0.84	118247	ordered	ordered
1050	Time spend outdoors in summer			Continuous	1.06	0.02	0.02	108466	numeric	numeric
1060	Time spent outdoors in winter			Continuous	1.05	0.26	0.28	94162	numeric	numeric
1070	Time spent watching television (TV)			Continuous	1.42	0	0	112962	numeric	numeric
1080	Time spent using computer			Continuous	1.01	0.61	0.62	92404	numeric	numeric
1090	Time spent driving			Continuous	0.92	0.01	0.02	79024	numeric	numeric
1100	Drive faster than motorway speed limit	Sometimes	Never/rarely	Ordered Categorical	1.11	0.1	0.2	116054	ordered	ordered
1100	Drive faster than motorway speed limit	Often	Never/rarely	Ordered Categorical	1.45	0	0	116054	ordered	ordered
1100	Drive faster than motorway speed limit	Most of the time	Never/rarely	Ordered Categorical	1.14	0.1	0.2	116054	ordered	ordered
1100	Drive faster than motorway speed limit	Do not drive on the motorway	Never/rarely	Ordered Categorical	1.07	0.37	0.57	116054	ordered	ordered
1110	Length of mobile phone use	One year or less	Never used mobile phone at least once per week	Ordered Categorical	1.02	0.74	0.91	117748	numeric	ordered
1110	Length of mobile phone use	Two to four years	Never used mobile phone at least once per week	Ordered Categorical	0.97	0.59	0.82	117748	numeric	ordered
1110	Length of mobile phone use	Five to eight years	Never used mobile phone at least once per week	Ordered Categorical	1.15	0.07	0.16	117748	numeric	ordered
1110	Length of mobile phone use	More than eight years	Never used mobile phone at least once per week	Ordered Categorical	0.98	0.79	0.93	117748	numeric	ordered
1160	Sleep duration			Continuous	0.92	0	0	118547	numeric	numeric
1170	Getting up in morning	Not very easy	Not at all easy	Ordered Categorical	0.6	0	0	119010	ordered	ordered
1170	Getting up in morning	Fairly easy	Not at all easy	Ordered Categorical	1.22	0	0	119010	ordered	ordered
1170	Getting up in morning	Very easy	Not at all easy	Ordered Categorical	0.99	0.78	0.93	119010	ordered	ordered
1180	Morning/evening person (chronotype)	More a 'morning' than 'evening' person	Definitely a 'morning' person	Ordered Categorical	1.17	0	0.01	106589	ordered	ordered
1180	Morning/evening person (chronotype)	More an 'evening' than a 'morning' person	Definitely a 'morning' person	Ordered Categorical	1.19	0	0	106589	ordered	ordered
1180	Morning/evening person (chronotype)	Definitely an 'evening' person	Definitely a 'morning' person	Ordered Categorical	0.97	0.51	0.76	106589	ordered	ordered
1190	Nap during day	Sometimes	Never/rarely	Ordered Categorical	1.65	0	0	119104	ordered	ordered
1190	Nap during day	Usually	Never/rarely	Ordered Categorical	0.89	0	0	119104	ordered	ordered
1200	Sleeplessness / insomnia	Sometimes	Never/rarely	Ordered Categorical	1.49	0	0	119071	ordered	ordered
1200	Sleeplessness / insomnia	Usually	Never/rarely	Ordered Categorical	1.05	0.13	0.24	119071	ordered	ordered
1210	Snoring	No	Yes	Binary	0.75	0	0	111289	ordered	ordered
1220	Daytime dozing / sleeping (narcolepsy)	Sometimes	Never/rarely	Ordered Categorical	0	0.98	1	118782	ordered	ordered
1220	Daytime dozing / sleeping (narcolepsy)	Usually	Never/rarely	Ordered Categorical	0	0.98	1	118782	ordered	ordered
1220	Daytime dozing / sleeping (narcolepsy)	Often	Never/rarely	Ordered Categorical	0.08	0.98	1	118782	ordered	ordered
1239	Current tobacco smoking	Yes, on most or all days	No	Ordered Categorical	0.85	0.13	0.24	119095	ordered	ordered
1239	Current tobacco smoking	Only occasionally	No	Ordered Categorical	0.61	0	0	119095	ordered	ordered
1249	Past tobacco smoking	Smoked occasionally	Smoked on most or all days	Ordered Categorical	0.77	0	0	109964	ordered	ordered
1249	Past tobacco smoking	Just tired once or twice	Smoked on most or all days	Ordered Categorical	1.43	0	0	109964	ordered	ordered
1249	Past tobacco smoking	I have never smoked	Smoked on most or all days	Ordered Categorical	0.97	0.66	0.87	109964	ordered	ordered
1259	Smoking/smokers in household	Yes, one household member smokes	No	Ordered Categorical	1.24	0.13	0.24	110200	ordered	ordered
1259	Smoking/smokers in household	Yes, more than one household member smokes	No	Ordered Categorical	1.02	0.87	1	110200	ordered	ordered
1269	Exposure to tobacco smoke at home			Continuous	1.26	0	0	108242	numeric	numeric
1279	Exposure to tobacco smoke outside home			Continuous	1.24	0	0	101481	numeric	numeric
1289	Cooked vegetable intake			Continuous	1.02	0.5	0.52	115775	numeric	numeric
1299	Salad / raw vegetable intake			Continuous	0.89	0	0	112186	numeric	numeric
1309	Fresh fruit intake			Continuous	0.98	0.63	0.63	115047	numeric	numeric
1319	Dried fruit intake			Continuous	0.78	0	0	108770	numeric	numeric
1329	Oily fish intake	Less than once a week	Never	Ordered Categorical	0.6	0.16	0.29	118629	ordered	ordered
1329	Oily fish intake	Once a week	Never	Ordered Categorical	0.86	0.64	0.86	118629	ordered	ordered
1329	Oily fish intake	2-4 times a week	Never	Ordered Categorical	0.73	0.21	0.37	118629	ordered	ordered
1329	Oily fish intake	5-6 times a week	Never	Ordered Categorical	0.93	0.69	0.89	118629	ordered	ordered
1329	Oily fish intake	Once or more daily	Never	Ordered Categorical	0.97	0.73	0.91	118629	ordered	ordered
1339	Non-oily fish intake	Less than once a week	Never	Ordered Categorical	1.55	0.1	0.2	118738	ordered	ordered
1339	Non-oily fish intake	Once a week	Never	Ordered Categorical	1.92	0	0.01	118738	ordered	ordered
1339	Non-oily fish intake	2-4 times a week	Never	Ordered Categorical	1.48	0.1	0.2	118738	ordered	ordered
1339	Non-oily fish intake	5-6 times a week	Never	Ordered Categorical	1.51	0.06	0.12	118738	ordered	ordered
1339	Non-oily fish intake	Once or more daily	Never	Ordered Categorical	1.2	0.13	0.24	118738	ordered	ordered
1349	Processed meat intake	Less than once a week	Never	Ordered Categorical	1.67	0	0	118992	ordered	ordered
1349	Processed meat intake	Once a week	Never	Ordered Categorical	0.9	0.37	0.58	118992	ordered	ordered
1349	Processed meat intake	2-4 times a week	Never	Ordered Categorical	0.95	0.61	0.84	118992	ordered	ordered
1349	Processed meat intake	5-6 times a week	Never	Ordered Categorical	0.97	0.66	0.87	118992	ordered	ordered
1349	Processed meat intake	Once or more daily	Never	Ordered Categorical	1.01	0.77	0.93	118992	ordered	ordered
1359	Poultry intake	Less than once a week	Never	Ordered Categorical	1.23	0.51	0.76	118962	ordered	ordered
1359	Poultry intake	Once a week	Never	Ordered Categorical	0.79	0.41	0.63	118962	ordered	ordered
1359	Poultry intake	2-4 times a week	Never	Ordered Categorical	1	0.99	1	118962	ordered	ordered
1359	Poultry intake	5-6 times a week	Never	Ordered Categorical	0.9	0.44	0.66	118962	ordered	ordered
1359	Poultry intake	Once or more daily	Never	Ordered Categorical	1.04	0.58	0.82	118962	ordered	ordered
1369	Beef intake	Less than once a week	Never	Ordered Categorical	1.25	0.72	0.91	118781	ordered	ordered
1369	Beef intake	Once a week	Never	Ordered Categorical	0.83	0.73	0.91	118781	ordered	ordered
1369	Beef intake	2-4 times a week	Never	Ordered Categorical	0.84	0.7	0.89	118781	ordered	ordered
1369	Beef intake	5-6 times a week	Never	Ordered Categorical	0.88	0.7	0.89	118781	ordered	ordered
1369	Beef intake	Once or more daily	Never	Ordered Categorical	0.93	0.65	0.86	118781	ordered	ordered
1379	Lamb/mutton intake	Less than once a week	Never	Ordered Categorical	0	0.97	1	118495	ordered	ordered
1379	Lamb/mutton intake	Once a week	Never	Ordered Categorical	0.01	0.98	1	118495	ordered	ordered
1379	Lamb/mutton intake	2-4 times a week	Never	Ordered Categorical	4.75	0.99	1	118495	ordered	ordered
1379	Lamb/mutton intake	5-6 times a week	Never	Ordered Categorical	73.13	0.99	1	118495	ordered	ordered
1379	Lamb/mutton intake	Once or more daily	Never	Ordered Categorical	17.14	0.98	1	118495	ordered	ordered
1389	Pork intake	Less than once a week	Never	Ordered Categorical	3.25	0.01	0.02	118550	ordered	ordered
1389	Pork intake	Once a week	Never	Ordered Categorical	1.27	0.55	0.79	118550	ordered	ordered
1389	Pork intake	2-4 times a week	Never	Ordered Categorical	0.68	0.28	0.47	118550	ordered	ordered
1389	Pork intake	5-6 times a week	Never	Ordered Categorical	0.7	0.21	0.37	118550	ordered	ordered
1389	Pork intake	Once or more daily	Never	Ordered Categorical	0.79	0.14	0.26	118550	ordered	ordered
1408	Cheese intake	Less than once a week	Never	Ordered Categorical	0.68	0	0	116410	ordered	ordered
1408	Cheese intake	Once a week	Never	Ordered Categorical	1.11	0.24	0.42	116410	ordered	ordered
1408	Cheese intake	2-4 times a week	Never	Ordered Categorical	1.03	0.67	0.87	116410	ordered	ordered
1408	Cheese intake	5-6 times a week	Never	Ordered Categorical	1	0.99	1	116410	ordered	ordered
1408	Cheese intake	Once or more daily	Never	Ordered Categorical	0.97	0.43	0.64	116410	ordered	ordered
1418	Milk type used	Full cream	Semi-skimmed	Unordered Categorical	0.92	0.35	0.56	119081	ordered	factor
1418	Milk type used	Skimmed	Semi-skimmed	Unordered Categorical	1.07	0.18	0.32	119081	ordered	factor
1418	Milk type used	Soya	Semi-skimmed	Unordered Categorical	0.72	0.01	0.03	119081	ordered	factor
1418	Milk type used	Other type of milk	Semi-skimmed	Unordered Categorical	1.11	0.57	0.81	119081	ordered	factor
1418	Milk type used	Never/rarely have milk	Semi-skimmed	Unordered Categorical	1.3	0.01	0.03	119081	ordered	factor
1428	Spread type	Never/rarely use spread	Other type of spread/margarine	Unordered Categorical	0.75	0	0	119024	ordered	factor
1428	Spread type	Butter/spreadable butter	Other type of spread/margarine	Unordered Categorical	0.88	0	0.01	119024	ordered	factor
1428	Spread type	Flora Pro-Active/Benecol	Other type of spread/margarine	Unordered Categorical	1.59	0.05	0.11	119024	ordered	factor
1438	Bread intake			Continuous	1.08	0	0	116622	numeric	numeric
1448	Bread type	White	Wholemeal or wholegrain	Unordered Categorical	1.38	0	0	115045	ordered	factor
1448	Bread type	Brown	Wholemeal or wholegrain	Unordered Categorical	1.26	0	0	115045	ordered	factor
1448	Bread type	Other type of bread	Wholemeal or wholegrain	Unordered Categorical	1.32	0.01	0.02	115045	ordered	factor
1458	Cereal intake			Continuous	0.82	0	0	114057	numeric	numeric
1478	Salt added to food	Sometimes	Never/rarely	Ordered Categorical	1.15	0.03	0.06	119128	ordered	ordered
1478	Salt added to food	Usually	Never/rarely	Ordered Categorical	0.98	0.77	0.93	119128	ordered	ordered
1478	Salt added to food	Always	Never/rarely	Ordered Categorical	1.06	0.28	0.46	119128	ordered	ordered
1488	Tea intake			Continuous	0.94	0	0	115490	numeric	numeric
1498	Coffee intake			Continuous	0.92	0	0.01	110385	numeric	numeric
1518	Hot drink temperature	Very hot	Do not drink hot drinks	Ordered Categorical	0.82	0.11	0.22	119114	ordered	ordered
1518	Hot drink temperature	Hot	Do not drink hot drinks	Ordered Categorical	1.54	0	0	119114	ordered	ordered
1518	Hot drink temperature	Warm	Do not drink hot drinks	Ordered Categorical	0.92	0.15	0.27	119114	ordered	ordered
1528	Water intake			Continuous	1.15	0	0	110019	numeric	numeric
1538	Major dietary changes in the last 5 years	Yes because of illness	No	Unordered Categorical	4.57	0	0	118929	ordered	factor
1538	Major dietary changes in the last 5 years	Yes because of other reasons	No	Unordered Categorical	1.63	0	0	118929	ordered	factor
1548	Variation in diet	Sometimes	Never/rarely	Ordered Categorical	1.44	0	0	118852	ordered	ordered
1548	Variation in diet	Often	Never/rarely	Ordered Categorical	0.95	0.18	0.32	118852	ordered	ordered
1558	Alcohol intake frequency.	Three or four times a week	Daily or almost daily	Ordered Categorical	2.38	0	0	119070	ordered	ordered
1558	Alcohol intake frequency.	Once or twice a week	Daily or almost daily	Ordered Categorical	1.06	0.3	0.49	119070	ordered	ordered
1558	Alcohol intake frequency.	One to three times a month	Daily or almost daily	Ordered Categorical	0.87	0.01	0.02	119070	ordered	ordered
1558	Alcohol intake frequency.	Special occasions only	Daily or almost daily	Ordered Categorical	1.04	0.48	0.71	119070	ordered	ordered
1558	Alcohol intake frequency.	Never	Daily or almost daily	Ordered Categorical	0.97	0.58	0.82	119070	ordered	ordered
1628	Alcohol intake versus 10 years previously	About the same	More nowadays	Ordered Categorical	1.61	0	0	110963	ordered	ordered
1628	Alcohol intake versus 10 years previously	Less nowadays	More nowadays	Ordered Categorical	1.17	0	0	110963	ordered	ordered
1647	Country of birth (UK/elsewhere)	Wales	England	Unordered Categorical	1.01	0.95	1	119128	numeric	factor
1647	Country of birth (UK/elsewhere)	Scotland	England	Unordered Categorical	1.07	0.59	0.82	119128	numeric	factor
1647	Country of birth (UK/elsewhere)	Northern Ireland	England	Unordered Categorical	0.47	0.09	0.19	119128	numeric	factor
1647	Country of birth (UK/elsewhere)	Republic of ireland	England	Unordered Categorical	1	1	1	119128	numeric	factor
1647	Country of birth (UK/elsewhere)	Elsewhere	England	Unordered Categorical	1.19	0.29	0.47	119128	numeric	factor
1677	Breastfed as a baby	Yes	No	Binary	1	0.92	1	90722	numeric	ordered
1687	Comparative body size at age 10	Plumper	Thinner	Ordered Categorical	0.84	0	0	117239	numeric	ordered
1687	Comparative body size at age 10	About average	Thinner	Ordered Categorical	0.8	0	0	117239	numeric	ordered
1697	Comparative height size at age 10	Taller	Shorter	Ordered Categorical	0.99	0.77	0.93	117241	numeric	ordered
1697	Comparative height size at age 10	About average	Shorter	Ordered Categorical	0.96	0.35	0.56	117241	numeric	ordered
1707	Handedness (chirality/laterality)	Left-handed	Right-handed	Unordered Categorical	1.07	0.31	0.51	119125	numeric	factor
1707	Handedness (chirality/laterality)	Use both right and left hands equally	Right-handed	Unordered Categorical	0.91	0.55	0.8	119125	numeric	factor
1717	Skin colour	Fair	Very fair	Ordered Categorical	0	0.97	1	117702	numeric	ordered
1717	Skin colour	light olive	Very fair	Ordered Categorical	0.01	0.97	1	117702	numeric	ordered
1717	Skin colour	Dark olive	Very fair	Ordered Categorical	0.02	0.97	1	117702	numeric	ordered
1717	Skin colour	Brown	Very fair	Ordered Categorical	0.19	0.97	1	117702	numeric	ordered
1717	Skin colour	Black	Very fair	Ordered Categorical	0.68	0.98	1	117702	numeric	ordered
1727	Ease of skin tanning	Get moderately tanned	Get very tanned	Ordered Categorical	1.15	0	0	116879	numeric	ordered
1727	Ease of skin tanning	Get mildly or occasionally tanned	Get very tanned	Ordered Categorical	1.13	0	0.01	116879	numeric	ordered
1727	Ease of skin tanning	Never tan, only burn	Get very tanned	Ordered Categorical	0.94	0.1	0.2	116879	numeric	ordered
1737	Childhood sunburn occasions			Continuous	0.92	0	0	89081	numeric	numeric
1747	Hair colour (natural, before greying)	Blonde	Light brown	Unordered Categorical	1.01	0.86	1	118952	numeric	factor
1747	Hair colour (natural, before greying)	Red	Light brown	Unordered Categorical	0.71	0	0.01	118952	numeric	factor
1747	Hair colour (natural, before greying)	Dark brown	Light brown	Unordered Categorical	0.96	0.32	0.52	118952	numeric	factor
1747	Hair colour (natural, before greying)	Black	Light brown	Unordered Categorical	1.11	0.25	0.42	118952	numeric	factor
1747	Hair colour (natural, before greying)	Other	Light brown	Unordered Categorical	1.26	0.11	0.22	118952	numeric	factor
1757	Facial ageing	Older than you are	Younger than you are	Ordered Categorical	1.09	0.01	0.02	109307	numeric	ordered
1757	Facial ageing	About your age	Younger than you are	Ordered Categorical	0.72	0	0	109307	numeric	ordered
1767	Adopted as a child	Yes	No	Binary	1.38	0	0	118993	numeric	ordered
1777	Part of a multiple birth	Yes	No	Binary	1.06	0.54	0.79	117541	numeric	ordered
1787	Maternal smoking around birth	Yes	No	Binary	1.26	0	0	102600	numeric	ordered
2129	Answered sexual history questions	Skip this section	Continue	Binary	1.15	0	0	119145	ordered	ordered
2139	Age first had sexual intercourse			Continuous	0.81	0	0	105006	numeric	numeric
2149	Lifetime number of sexual partners			Continuous	1.07	0.02	0.03	98226	numeric	numeric
2159	Ever had same-sex intercourse	Yes	No	Binary	1.27	0	0.01	107968	ordered	ordered
2237	Plays computer games	Sometimes	Never/rarely	Ordered Categorical	1.45	0	0	119089	numeric	ordered
2237	Plays computer games	Often	Never/rarely	Ordered Categorical	0.9	0.04	0.1	119089	numeric	ordered
2267	Use of sun/uv protection	Sometimes	Never/rarely	Ordered Categorical	1.51	0	0	119094	numeric	ordered
2267	Use of sun/uv protection	Most of the time	Never/rarely	Ordered Categorical	2.33	0	0	119094	numeric	ordered
2267	Use of sun/uv protection	Always	Never/rarely	Ordered Categorical	1.27	0	0	119094	numeric	ordered
2267	Use of sun/uv protection	Do not go out in the sunshine	Never/rarely	Ordered Categorical	1.04	0.42	0.64	119094	numeric	ordered
2277	Frequency of solarium/sunlamp use			Continuous	0.83	0.02	0.02	112548	numeric	numeric
6138	Qualifications	None of the above	College or University degree	Unordered Categorical	2.52	0	0	118167	ordered	factor
6138	Qualifications	A levels/AS levels or equivalent	College or University degree	Unordered Categorical	1.23	0.01	0.04	118167	ordered	factor
6138	Qualifications	O levels/GCSEs or equivalent	College or University degree	Unordered Categorical	1.62	0	0	118167	ordered	factor
6138	Qualifications	CSEs or equivalent	College or University degree	Unordered Categorical	1.92	0	0	118167	ordered	factor
6138	Qualifications	NVQ or HND or HNC or equivalent	College or University degree	Unordered Categorical	1.85	0	0	118167	ordered	factor
6138	Qualifications	Other professional qualifications eg: nursing teaching	College or University degree	Unordered Categorical	1.55	0	0	118167	ordered	factor
6139	Gas or solid-fuel cooking/heating	None of the above	A gas hob or gas cooker	Unordered Categorical	1.02	0.68	0.89	118953	ordered	factor
6139	Gas or solid-fuel cooking/heating	A gas fire that you use regularly in winter time	A gas hob or gas cooker	Unordered Categorical	1.03	0.65	0.86	118953	ordered	factor
6139	Gas or solid-fuel cooking/heating	An open solid fuel fire that you use regularly in winter time	A gas hob or gas cooker	Unordered Categorical	0.57	0	0	118953	ordered	factor
6142	Current employment status	None of the above	In paid employment or self-employed	Unordered Categorical	1.09	0.77	0.93	118840	ordered	factor
6142	Current employment status	Retired	In paid employment or self-employed	Unordered Categorical	1.13	0.03	0.07	118840	ordered	factor
6142	Current employment status	Looking after home and/or family	In paid employment or self-employed	Unordered Categorical	1.38	0.04	0.09	118840	ordered	factor
6142	Current employment status	Unable to work because of sickness or disability	In paid employment or self-employed	Unordered Categorical	3.96	0	0	118840	ordered	factor
6142	Current employment status	Unemployed	In paid employment or self-employed	Unordered Categorical	1.97	0	0	118840	ordered	factor
6142	Current employment status	Doing unpaid or voluntary work	In paid employment or self-employed	Unordered Categorical	1.1	0.78	0.93	118840	ordered	factor
6142	Current employment status	Full or part-time student	In paid employment or self-employed	Unordered Categorical	0.79	0.74	0.91	118840	ordered	factor
6144	Never eat eggs, dairy, wheat, sugar	Eggs or foods containing eggs	I eat all of the above	Unordered Categorical	1.55	0	0	118846	ordered	factor
6144	Never eat eggs, dairy, wheat, sugar	Dairy products	I eat all of the above	Unordered Categorical	1.68	0	0	118846	ordered	factor
6144	Never eat eggs, dairy, wheat, sugar	Wheat products	I eat all of the above	Unordered Categorical	1.43	0.01	0.03	118846	ordered	factor
6144	Never eat eggs, dairy, wheat, sugar	Sugar or foods/drinks containing sugar	I eat all of the above	Unordered Categorical	1.74	0	0	118846	ordered	factor
6146	Attendance/disability/mobility allowance	Attendance allowance	None of the above	Unordered Categorical	2.99	0	0	118395	numeric	factor
6146	Attendance/disability/mobility allowance	Disability living allowance	None of the above	Unordered Categorical	2.85	0	0	118395	numeric	factor
6146	Attendance/disability/mobility allowance	Blue badge	None of the above	Unordered Categorical	2.69	0	0	118395	numeric	factor
6162	Types of transport used (excluding work)	None of the above	Car/motor vehicle	Unordered Categorical	1.87	0.06	0.13	118765	ordered	factor
6162	Types of transport used (excluding work)	Walk	Car/motor vehicle	Unordered Categorical	0.85	0.01	0.03	118765	ordered	factor
6162	Types of transport used (excluding work)	Public transport	Car/motor vehicle	Unordered Categorical	1.84	0	0	118765	ordered	factor
6162	Types of transport used (excluding work)	Cycle	Car/motor vehicle	Unordered Categorical	0.43	0.01	0.02	118765	ordered	factor
6164	Types of physical activity in last 4 weeks	None of the above	Walking for pleasure (not as a means of transport)	Unordered Categorical	2.79	0	0	118752	ordered	factor
6164	Types of physical activity in last 4 weeks	Other exercises (eg: swimming cycling keep fit bowling)	Walking for pleasure (not as a means of transport)	Unordered Categorical	1.13	0.07	0.15	118752	ordered	factor
6164	Types of physical activity in last 4 weeks	Strenuous sports	Walking for pleasure (not as a means of transport)	Unordered Categorical	0.99	0.96	1	118752	ordered	factor
6164	Types of physical activity in last 4 weeks	Light DIY (eg: pruning watering the lawn)	Walking for pleasure (not as a means of transport)	Unordered Categorical	1.59	0	0	118752	ordered	factor
6164	Types of physical activity in last 4 weeks	Heavy DIY (eg: weeding lawn mowing carpentry digging)	Walking for pleasure (not as a means of transport)	Unordered Categorical	1.42	0	0	118752	ordered	factor
20116	Smoking status	Previous	Never	Unordered Categorical	1.35	0	0	118752	ordered	factor
20116	Smoking status	Current	Never	Unordered Categorical	1.62	0	0	118752	ordered	factor
20117	Alcohol drinker status	Never	Current	Unordered Categorical	1.61	0	0	119070	ordered	factor
20117	Alcohol drinker status	Previous	Current	Unordered Categorical	2.22	0	0	119070	ordered	factor
20118	Home area population density - urban or rural	England/Wales - Urban - sparse	England/Wales - Urban - less sparse	Unordered Categorical	0	1	1	118078	ordered	factor
20118	Home area population density - urban or rural	England/Wales - Town and Fringe - sparse	England/Wales - Urban - less sparse	Unordered Categorical	0	0.99	1	118078	ordered	factor
20118	Home area population density - urban or rural	England/Wales - Village - sparse	England/Wales - Urban - less sparse	Unordered Categorical	0	0.99	1	118078	ordered	factor
20118	Home area population density - urban or rural	England/Wales - Town and Fringe - less sparse	England/Wales - Urban - less sparse	Unordered Categorical	0.76	0	0	118078	ordered	factor
20118	Home area population density - urban or rural	England/Wales - Village - less sparse	England/Wales - Urban - less sparse	Unordered Categorical	0.62	0	0	118078	ordered	factor
20118	Home area population density - urban or rural	England/Wales - Hamlet and Isolated Dwelling - less sparse	England/Wales - Urban - less sparse	Unordered Categorical	0.82	0.17	0.31	118078	ordered	factor
20118	Home area population density - urban or rural	Postcode not linkable	England/Wales - Urban - less sparse	Unordered Categorical	0	0.92	1	118078	ordered	factor
20118	Home area population density - urban or rural	Scotland - Large Urban Area	England/Wales - Urban - less sparse	Unordered Categorical	0	0.91	1	118078	ordered	factor
20118	Home area population density - urban or rural	Scotland - Other Urban Area	England/Wales - Urban - less sparse	Unordered Categorical	0	0.91	1	118078	ordered	factor
20118	Home area population density - urban or rural	Scotland - Accessible Small Town	England/Wales - Urban - less sparse	Unordered Categorical	0	0.91	1	118078	ordered	factor
20118	Home area population density - urban or rural	Scotland - Remote Small Town	England/Wales - Urban - less sparse	Unordered Categorical	0	0.91	1	118078	ordered	factor
20118	Home area population density - urban or rural	Scotland - Accessible Rural	England/Wales - Urban - less sparse	Unordered Categorical	0	0.91	1	118078	ordered	factor
20118	Home area population density - urban or rural	Scotland - Remote Rural	England/Wales - Urban - less sparse	Unordered Categorical	0	0.93	1	118078	ordered	factor
20160	Ever smoked	Yes	No	Binary	1.14	0	0	118759	ordered	ordered
24003	Nitrogen dioxide air pollution; 2010			Continuous	1.18	0	0	117593	numeric	numeric
24004	Nitrogen oxides air pollution; 2010			Continuous	1.17	0	0	117593	numeric	numeric
24005	Particulate matter air pollution (pm10); 2010			Continuous	1.1	0	0	109119	numeric	numeric
24006	Particulate matter air pollution (pm2.5); 2010			Continuous	1.18	0	0	109119	numeric	numeric
24007	Particulate matter air pollution (pm2.5) absorbance; 2010			Continuous	1.12	0	0	109119	numeric	numeric
24008	Particulate matter air pollution 2.5-10um; 2010			Continuous	1.06	0	0.01	109119	numeric	numeric
24009	Traffic intensity on the nearest road			Continuous	1.04	0.44	0.47	117593	numeric	numeric
24010	Inverse distance to the nearest road			Continuous	1.03	0.17	0.19	117593	numeric	numeric
24011	Traffic intensity on the nearest major road			Continuous	1.04	0.03	0.05	117593	numeric	numeric
24012	Inverse distance to the nearest major road			Continuous	1.06	0.01	0.01	117593	numeric	numeric
24013	Total traffic load on major roads			Continuous	1.08	0.03	0.04	117593	numeric	numeric
24014	Close to major road	Yes	No	Binary	1.09	0.09	0.19	117593	numeric	ordered
24015	Sum of road length of major roads within 100m			Continuous	1.07	0.06	0.08	117593	numeric	numeric
24016	Nitrogen dioxide air pollution; 2005			Continuous	1.21	0	0	117593	numeric	numeric
24017	Nitrogen dioxide air pollution; 2006			Continuous	1.2	0	0	117593	numeric	numeric
24018	Nitrogen dioxide air pollution; 2007			Continuous	1.21	0	0	117593	numeric	numeric
24019	Particulate matter air pollution (pm10); 2007			Continuous	1.28	0	0	117319	numeric	numeric
24020	Average daytime sound level of noise pollution			Continuous	1.03	0.15	0.18	117593	numeric	numeric
24021	Average evening sound level of noise pollution			Continuous	1.03	0.15	0.18	117593	numeric	numeric
24022	Average night-time sound level of noise pollution			Continuous	1.03	0.15	0.18	117593	numeric	numeric
24023	Average 16-hour sound level of noise pollution			Continuous	1.03	0.16	0.18	117593	numeric	numeric
24024	Average 24-hour sound level of noise pollution			Continuous	1.03	0.16	0.18	117593	numeric	numeric
